# Supplementary material
Source: publisher figshare collection journal article supplement (https://gsapubs.figshare.com/ndownloader/files/22408473)
Supplement: Supplementary file 1 [file 22408473]

## Sheet: Appendices
Supplemental File 2: BHVO statistics
Sample	100226	100226	100226	100226	100227	100227	100227	100227	100227	100227	100227	100227	100227	100305	100305	100305	100305	100305	100910	100910	100910	100910	100910	100910	100920	100920	100920	100920	100928	100928	100928	100928	100929	100929	100929	100929	110524	110523	110523	110523	110524	110524	110524	110524	110525	110525	110525	110525	110525
	BHVOA	BHVOB	BHVOC	BHVOD	BHVOA	BHVOB	BHVOC	BHVOD	BHVOF	BHVOH	BHVOI	BHVOJ	BHVOG	BHVOA	BHVOB	BHVOC	BHVOF	BHVOG	BHVOA	BHVOB	BHVOD	BHVOE	BHVOF	BHVOA	BHVOB	BHVOC	BHVOE	BHVOF	BHVOE	BHVOF	BHVOG	BHVOB	BHVOA	BHVOB	9BHVOC	BHVOD	BHVOa	BHVOb	BHVOb	BHVOh	BHVOA	BHVOb	BHVOC	BHVOE	BHVOA	BHVOB	BHVOC	BHVOD	BHVOE
Sc	30.8783	30.3558	31.306	30.9176	31.3382	31.8036	31.5738	31.3661	28.5854	29.0188	28.5398	28.0922	29.12	30.598	31.7508	32.6827	28.695	28.7177	25.4487	26.255	26.24	26.3505	26.9657	27.1665	27.2189	26.9679	27.0088	26.2761	29.4288	29.4371	29.4154	29.5126	30.4803	31.0961	31.1741	30.1381	27.9649	27.5505	30.0239	31.7282	27.9649	27.5505	28.2512	28.3166	29.8776	30.3452	29.6981	29.9345	30.8178
Ti	19908.8	20098.6	20261.9	20206.4	19892.6	20704.9	20698.3	22066.4	18942.6	19515.4	18786.9	19367.6	19502.6	18956.6	20432.7	20908.5	20101.8	19944	17769	17497.9	17581.3	18261.8	18351.2	17483.8	17816.8	18558.9	18887.3	18829.4	18458.6	18928.7	19083.4	18740.1	20104.5	19909.6	20142.4	20013	18964.3	18781	19390.4	20153.6	18964.3	18781	19359.9	19292.3	19026.1	19322	19534.3	19569.6	19748.3
V	297.549	303.228	306.386	294.043	300.194	303.725	296.733	299.291	296.931	296.98	293.522	308.833	299.697	298.309	294.495	293.336	298.653	300.862	298.046	309.919	298.466	305.903	300.551	299.706	300.041	305.168	312.161	306.389	298.823	308.423	301.245	324.882	306.348	306.257	311.328	298.507	302.705	299.822	290.839	295.579	302.705	299.822	296.081	297.141	290.429	292.603	286.518	293.165	290.646
Cr	304.682	310.643	292.792	301.663	295.322	311.578	339.186	321.082	323.85	301.998	300.479	329.277	328.883	306.55	305.087	289.824	303.711	304.669	348.769	342.143	333.805	327.231	302.553	315.556	317.718	321.189	304.747	328.336	313.688	304.783	314.235	336.718	309.603	335.672	329.445	310.251	312.287	318.75	292.927	299.921	312.287	318.75	331.328	304.015	301.304	296.395	304.302	321.263	308.895
Mn	1255.47	1257.78	1281.45	1281.15	1274.63	1316.05	1309.89	1335.82	1278.35	1260.39	1254.62	1289.81	1283.21	1268.62	1279.09	1296.46	1258.81	1263.23	1229.01	1269.78	1257.39	1251.14	1233.33	1225.93	1242.45	1252.99	1252.63	1257.4	1260.44	1258.59	1271.79	1302.22	1276.62	1283.85	1294.31	1265.76	1259.62	1242.93	1241.62	1280.29	1259.62	1242.93	1266.55	1243.17	1239.87	1239.63	1242.98	1269.32	1265.31
Sr	366.87	368.585	372.149	372.503	366.438	373.383	377.7	370.117	353.989	357.583	348.486	353.17	353.827	366.382	374.61	384.947	352.108	360.878	328.061	337.092	344.234	336.46	339.081	334.825	338.936	347.326	345.043	339.212	351.845	358.299	355.547	366.774	366.01	375.026	377.184	360.793	351.186	347.732	363.353	378.294	351.186	347.732	352.644	348.664	356.95	360.517	354.414	358.954	365.286
Y	21.2768	21.0924	21.4794	21.851	21.102	21.7335	21.418	21.2684	19.7017	19.4985	19.5773	19.1589	19.7809	21.1656	22.0938	22.6539	19.3417	19.864	16.8986	17.0168	17.7064	17.3945	17.7204	17.4731	18.2734	18.3958	18.33	17.6434	19.984	20.0829	20.1547	19.998	20.9747	21.2744	21.1635	20.4027	18.7722	18.4455	20.7726	21.8847	18.7722	18.4455	19.0907	18.8421	20.3494	20.716	20.2454	20.2884	20.7787
Zr	138.793	140.005	142.781	144.807	140.729	146.047	142.845	140.025	131.822	130.864	130.551	127.991	130.395	141.069	146.156	150.873	126.918	131.516	112.155	112.726	119.479	116.884	117.963	119.715	120.968	122.116	122.498	117.427	133.669	134.93	135.694	131.598	136.802	141.064	140.634	135.343	127.813	123.682	137.682	143.969	127.813	123.682	125.986	124.948	133.343	136.704	136.755	135.773	138.569
Nb	17.4432	17.3816	17.5267	17.8178	17.5801	18.2948	17.9756	17.9215	16.9242	17.1638	16.6516	16.9565	16.8953	17.8797	17.901	18.5185	16.8527	17.1298	15.2362	16.2543	16.163	15.8575	16.1419	16.0384	16.1248	16.2029	16.1527	16.2842	17.2255	17.3806	17.4438	17.2491	17.3031	17.8002	17.7318	17.1593	16.8036	16.6377	17.4156	18.1809	16.8036	16.6377	16.9776	16.7416	17.0677	17.3867	17.2254	17.0146	17.6377
Ba	120.492	122.119	125.977	127.471	123.429	124.686	127.552	123.912	121.477	122.207	120.78	119.452	116.878	121.253	125.202	126.76	119.334	119.235	114.497	120.233	119.479	118.508	117.184	117.868	120.047	119.687	119.706	117.187	118.883	122.5	119.099	124.323	121.869	125.667	127.357	122.53	121.006	119.955	123.86	128.679	121.006	119.955	123.912	120.57	124.637	125.486	121.4	121.688	124.29
La	14.0991	13.9904	14.2248	14.2893	14.2203	14.6046	14.517	14.2157	13.4646	13.6357	13.2102	13.2593	13.4993	14.3493	14.48	14.8621	13.1861	13.5381	11.8349	12.3158	12.448	12.3539	12.6779	12.5789	12.6495	12.8198	12.658	12.4327	13.1334	13.6666	13.6104	13.669	14.0707	14.3402	14.5038	13.8068	13.0471	12.752	13.74	14.704	13.0471	12.752	12.9325	12.8664	13.6537	14.0402	13.6765	13.8457	13.931
Ce	34.8295	35.3965	35.552	35.8491	35.3027	36.1471	36.6799	35.5405	34.7324	34.7921	34.1844	35.6045	34.5337	35.1452	36.2739	36.3923	34.6375	35.0165	33.0244	34.5585	34.8929	34.3507	34.4135	33.6441	34.5368	34.8342	35.1556	34.3872	34.2992	35.2604	35.1636	35.5815	35.1657	36.6009	36.3791	35.0913	35.1999	34.7294	35.7672	36.3394	35.1999	34.7294	35.7874	34.9611	34.8793	34.6883	34.3995	34.8749	35.4818
Pr	4.85104	4.88861	4.99181	4.99409	4.87624	5.04869	4.94529	4.9616	4.68447	4.85151	4.78211	4.6682	4.60323	4.81851	4.98959	5.14278	4.71039	4.64865	4.37292	4.44609	4.63667	4.51332	4.56596	4.4183	4.55123	4.55217	4.65081	4.61169	4.64074	4.81537	4.80591	4.81747	4.92081	4.96484	5.01857	4.84381	4.57425	4.57611	4.83662	5.05505	4.57425	4.57611	4.61648	4.66384	4.71492	4.72718	4.7878	4.87271	4.89243
Nd	23.1652	23.2106	22.2653	22.5491	23.1514	23.1985	22.2713	23.1163	21.3708	22.3799	20.8247	21.3521	21.8336	21.9066	22.9296	23.8722	21.4622	21.4453	19.0919	19.9672	20.0811	19.8169	20.735	20.0826	19.4892	20.2944	20.8551	19.9003	21.5874	21.9488	21.5309	21.609	22.4234	22.9914	23.1854	22.2473	21.1721	20.9084	22.6896	23.7796	21.1721	20.9084	21.3415	21.2009	21.6878	22.7766	21.7331	21.8669	22.4301
Sm	5.70369	5.4666	5.58231	5.99844	5.69918	5.6591	5.57506	5.57105	5.10721	5.64746	5.23012	5.11511	5.28962	5.51755	5.95913	6.19778	5.55003	5.29155	4.68595	4.83803	4.71461	4.89698	4.79814	4.94584	5.21353	4.94874	5.07937	4.91808	5.25455	5.48849	5.32838	5.36729	5.60558	5.79995	5.64619	5.21605	5.10432	5.05087	5.58521	5.67593	5.10432	5.05087	4.90752	4.83982	5.25913	5.31117	5.3082	5.25637	5.46716
Eu	1.87905	1.99759	1.93697	2.00452	1.8824	1.95441	2.01745	1.97331	1.78977	1.88764	1.77827	1.84469	1.79458	1.98544	1.90458	2.02915	1.84903	1.95043	1.70174	1.78188	1.74318	1.73112	1.74308	1.77376	1.88753	1.79265	1.8003	1.78838	1.85279	1.88714	1.80192	1.9617	1.92885	2.05992	1.96274	1.89726	1.88074	1.79073	1.86454	1.97603	1.88074	1.79073	1.82698	1.87869	1.88741	1.90457	1.88426	1.94509	1.9295
Gd	5.72893	5.65494	5.78218	5.82767	5.54949	5.50541	5.72664	5.40959	5.01048	5.3496	4.76697	5.21808	5.51514	5.36638	5.55679	6.01466	5.05848	5.38647	4.24664	4.83924	4.57674	4.59229	4.82825	4.8148	4.62145	5.02202	4.60152	4.67008	5.52401	5.5091	5.34346	5.54909	5.53609	5.55687	5.77367	5.21788	5.0396	4.95377	5.76082	5.61346	5.0396	4.95377	4.9271	5.01832	5.67798	5.73573	5.1522	5.46548	5.45961
Tb	0.797803	0.802566	0.83153	0.81013	0.828719	0.849156	0.797496	0.826168	0.70609	0.739647	0.711752	0.718308	0.720885	0.778072	0.828259	0.880747	0.717813	0.708245	0.627285	0.645631	0.670595	0.680201	0.661588	0.676504	0.641184	0.696489	0.632811	0.67655	0.713473	0.775272	0.762605	0.76765	0.806367	0.776225	0.817266	0.76597	0.670386	0.686564	0.779678	0.843232	0.670386	0.686564	0.718358	0.672122	0.790103	0.762658	0.728666	0.786866	0.774311
Dy	4.6214	4.90557	4.82827	4.77152	4.89993	4.89958	4.83157	4.83974	4.47969	4.08036	4.33806	4.25063	4.21144	4.70325	4.90574	5.11638	4.46883	4.66071	3.83235	3.97851	3.90831	3.89953	4.1252	4.1216	4.04632	3.9454	4.14863	3.8639	4.2938	4.63842	4.44782	4.47574	4.64997	4.75365	4.81147	4.63087	4.30564	4.11162	4.61688	4.75854	4.30564	4.11162	4.53595	4.20464	4.37709	4.59424	4.58329	4.45637	4.67829
Ho	0.83572	0.863342	0.883304	0.876053	0.813412	0.868778	0.863017	0.880524	0.774529	0.799895	0.823886	0.75481	0.712461	0.825248	0.881417	0.855218	0.798777	0.809297	0.673065	0.663192	0.699574	0.682552	0.71546	0.725066	0.772529	0.758604	0.782329	0.729808	0.781214	0.817822	0.811055	0.798023	0.825284	0.876409	0.878749	0.832512	0.755025	0.748839	0.865819	0.856756	0.755025	0.748839	0.782504	0.696901	0.802394	0.841035	0.81482	0.81209	0.821935
Er	2.13567	2.20493	2.17101	2.17424	2.29766	2.45504	2.28947	2.33956	2.13692	1.99591	1.9558	2.05948	2.10558	2.27288	2.24434	2.42362	2.13938	2.05602	1.76923	1.80388	1.86078	1.82186	1.90657	1.98305	1.89468	1.90195	1.87628	1.9371	2.06693	2.11239	2.05653	2.01934	2.11566	2.39648	2.26384	2.14953	2.058	2.10872	2.25731	2.44357	2.058	2.10872	2.13824	1.97397	2.14798	2.23625	2.27414	2.18276	2.32903
Tm	0.270555	0.299427	0.304545	0.272682	0.312301	0.273716	0.287716	0.300517	0.260266	0.273884	0.231994	0.265699	0.270234	0.302471	0.299531	0.322377	0.257396	0.277373	0.242966	0.250836	0.234437	0.23427	0.25052	0.273044	0.218203	0.234551	0.248784	0.236111	0.278517	0.23565	0.280368	0.262076	0.286422	0.280434	0.311115	0.287319	0.258787	0.27332	0.264907	0.288858	0.258787	0.27332	0.25056	0.259421	0.262759	0.275127	0.260781	0.242189	0.265182
Yb	1.76475	1.77213	1.82086	1.93908	1.74919	1.89982	1.744	1.59923	1.55608	1.74747	1.5593	1.59834	1.60128	1.63886	1.93546	2.02362	1.59345	1.53577	1.46271	1.49456	1.48327	1.50633	1.51408	1.54345	1.62137	1.44342	1.65681	1.46426	1.73785	1.73744	1.59391	1.66241	1.75484	1.86529	1.69623	1.74197	1.50759	1.46195	1.69388	1.82324	1.50759	1.46195	1.60097	1.55613	1.75784	1.76019	1.5827	1.65921	1.78241
Lu	0.242126	0.235047	0.201504	0.196472	0.24629	0.259912	0.27673	0.254999	0.195713	0.230332	0.207982	0.238882	0.228745	0.246977	0.261785	0.260153	0.219861	0.222215	0.181483	0.190938	0.187404	0.191836	0.201643	0.214018	0.196047	0.195484	0.196952	0.196431	0.241084	0.207032	0.205564	0.209676	0.257204	0.223375	0.22812	0.22829	0.187652	0.192132	0.222536	0.247341	0.187652	0.192132	0.20486	0.21235	0.202894	0.194702	0.171291	0.214236	0.221001
Hf	3.88357	3.76683	3.73778	3.77035	3.54127	3.97086	3.82752	3.6056	3.61592	3.51016	3.25893	3.27381	3.49161	3.77731	3.75785	3.9036	3.35262	3.42132	2.76354	2.80548	2.99045	3.03802	3.10839	3.2388	3.20859	3.02696	3.1515	2.9402	3.28721	3.41081	3.59577	3.22388	3.65657	3.77262	3.74351	3.43162	3.23075	3.1554	3.94235	3.67882	3.23075	3.1554	2.90933	3.35959	3.55683	3.5198	3.44038	3.32433	3.38306
Ta	1.11661	1.11355	1.11629	1.1527	1.19006	1.16338	1.1307	1.12586	0.99353	1.07583	1.08527	1.03915	1.13287	1.06179	1.12373	1.17725	0.987201	1.06961	0.900971	0.955286	0.907533	0.943433	0.935999	0.945849	0.897779	1.02814	1.05839	0.989187	1.05203	1.06406	1.00725	1.03777	1.11538	1.15169	1.12842	1.09712	1.01597	0.927931	1.09252	1.09535	1.01597	0.927931	0.989879	0.97756	0.992373	1.02935	1.06903	1.09665	1.09048
Pb	1.58016	1.5554	1.57012	1.73812	1.73448	1.73414	1.62254	1.66151	1.63745	1.53619	1.50241	1.60139	1.63157	1.42094	1.51508	1.61279	1.45963	1.6031	1.59198	1.69158	1.79684	1.58603	1.465	1.45843	1.54963	1.57928	1.81514	1.67522	1.63644	1.61071	1.62555	1.61824	1.5616	1.64957	1.68098	1.49523	1.68578	1.66107	1.54608	1.50769	1.68578	1.66107	1.53349	1.63409	1.4786	1.49117	1.41132	1.52783	1.5643
Th	1.10642	1.13859	1.19982	1.18115	1.10635	1.15749	1.1008	1.07038	1.04731	1.01222	1.0546	0.993229	1.01522	1.12525	1.13187	1.21346	1.06873	0.972836	0.842874	0.866846	0.939781	0.956896	0.987742	0.92142	0.978931	0.95561	0.999139	0.878028	1.01327	1.01302	1.00283	1.0816	1.09306	1.07936	1.07928	1.09119	0.939359	0.961591	1.09661	1.08153	0.939359	0.961591	1.03295	0.940333	1.06639	1.13164	0.949561	1.11301	1.06693
U	0.406542	0.397229	0.358132	0.4046	0.375363	0.414632	0.393177	0.405081	0.401248	0.405191	0.381935	0.39751	0.38946	0.403685	0.419277	0.374685	0.415212	0.379974	0.39718	0.400782	0.425289	0.399072	0.365263	0.370107	0.407403	0.392371	0.407748	0.367045	0.36379	0.412695	0.42548	0.395362	0.39519	0.394736	0.409914	0.405551	0.409097	0.375341	0.375552	0.36778	0.409097	0.375341	0.37704	0.427029	0.400422	0.374676	0.313248	0.411523	0.37332
[truncated: 8 more columns]
